# Supplementary material for: Fabrication of Pt cluster-loaded In2O3 inverse opal photonic crystals for fast and highly sensitive ethanol sensing
Source: Royal Society of Chemistry journal article supplement (doi:10.1039/d2tc04341f), 2022-12-29
Supplement: d2tc04341f1.pdf [file d2tc04341f1.pdf]

## Supporting Information

### **Fabrication of Pt clusters-loaded $\text{In}_2\text{O}_3$ inverse opal photonic crystal for fast and highly sensitive ethanol sensing**

Feihu Li<sup>a,b</sup>, Junjie Jing<sup>a</sup>, Jinkun Li<sup>a</sup>, Shuni Li<sup>a</sup>, Dongliang Cheng<sup>a</sup>, Yeguang Zhang<sup>\*a</sup>, Zili Zhan<sup>a</sup> and Bingtao Tang<sup>\*b</sup>

*<sup>a</sup>School of Chemical Engineering, Zhengzhou University, Zhengzhou, 450001 China. E-mail: zhangyg@zzu.edu.cn*

*<sup>b</sup>State Key Laboratory of Fine Chemicals, Dalian University of Technology, Dalian, 116024, P. R. China. E-mail: tangbt@dlut.edu.cn*

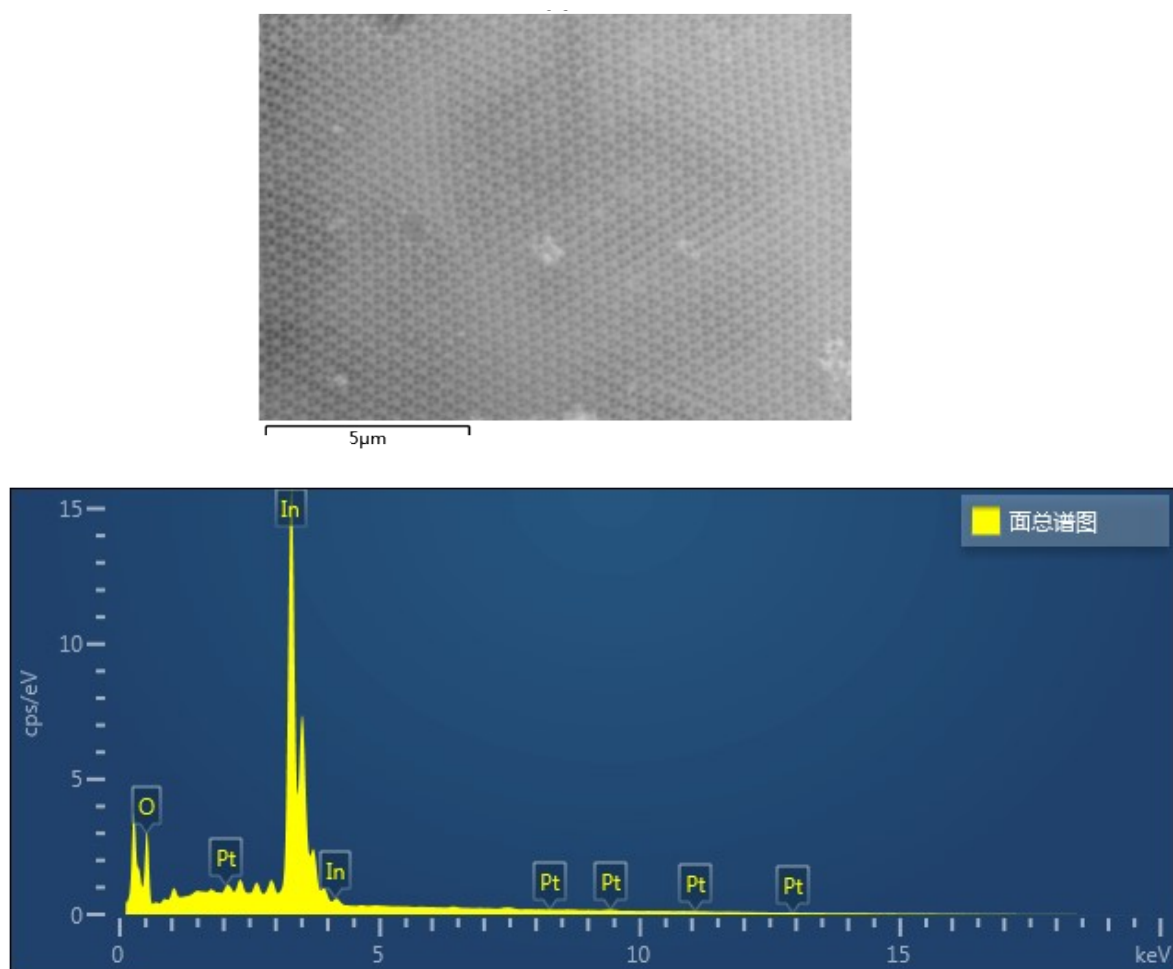

**Fig. S1** EDS spectrum of Pt<sub>2.0</sub>In

**Table S1** Elemental content in EDS spectra of Pt<sub>2.0</sub>In

| Element | wt%   |
|---------|-------|
| O       | 25.61 |
| In      | 72.39 |
| Pt      | 2.00  |

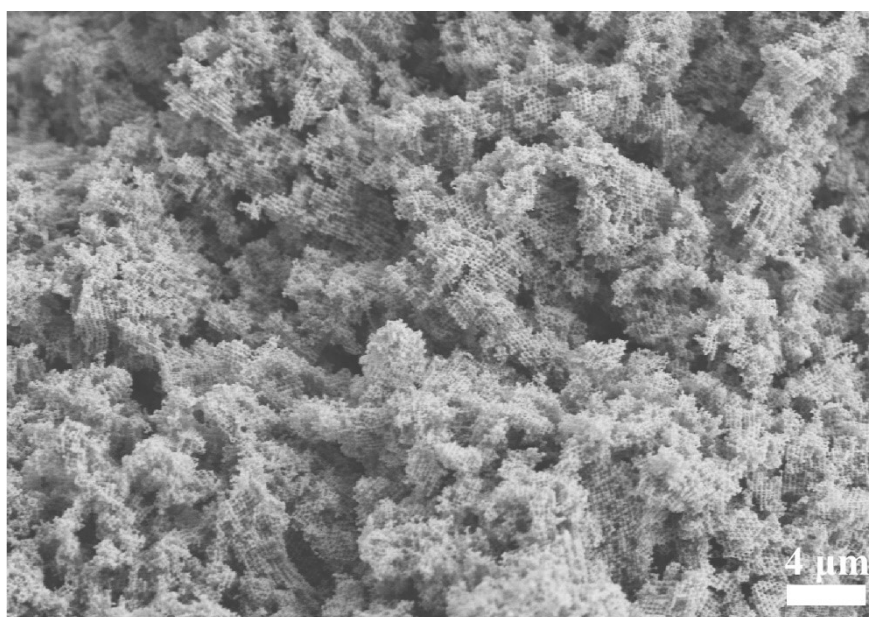

**Fig. S2** The SEM image of the gas sensing layer formed on the ceramic tube

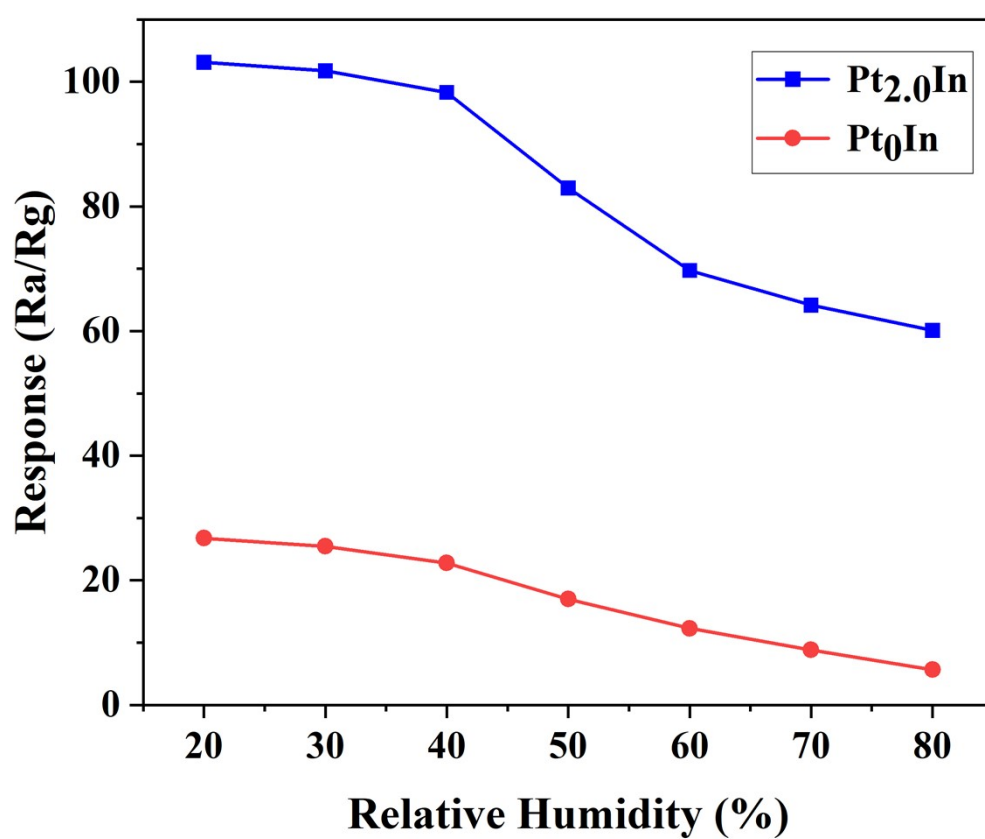

**Fig. S3** The response of  $Pt_0In$  and  $Pt_{2.0}In$  under different relative humidity
